# Supplementary material for: Methanol-Independent Protein Expression by AOX1 Promoter with trans-Acting Elements Engineering and Glucose-Glycerol-Shift Induction in Pichia pastoris
Source: PubMed Central journal article supplement (PMC5288789; doi:10.1038/srep41850), 2017-02-02
Supplement: srep41850-s1.pdf [file srep41850-s1.pdf]

## Supplementary Information

### **Methanol-Independent Protein Expression by *AOX1* Promoter with *trans*-Acting Elements Engineering and Glucose-Glycerol-Shift Induction in *Pichia pastoris***

Jinjia Wang<sup>1</sup>, Xiaolong Wang<sup>1</sup>, Lei Shi<sup>1</sup>, Fei Qi<sup>1</sup>, Ping Zhang<sup>1</sup>, Yuanxing Zhang<sup>1,2</sup>, Xiangshan Zhou<sup>1,\*</sup>, Zhiwei Song<sup>3,4,\*</sup>, Menghao Cai<sup>1,\*</sup>

<sup>1</sup> State Key Laboratory of Bioreactor Engineering, East China University of Science and Technology, 130 Meilong Road, Shanghai 200237, China

<sup>2</sup> Shanghai Collaborative Innovation Center for Biomanufacturing, 130 Meilong Road, Shanghai 200237, China

<sup>3</sup> Bioprocessing Technology Institute, 20 Biopolis Way, #06-01 Centros, Singapore

<sup>4</sup> Department of Biochemistry, Yong Loo Lin School of Medicine, National University of Singapore, 21 Lower Kent Ridge Road, Singapore

\*Corresponding author. Tel./fax: +86-21-64253306.

*E-mail address*: cmh022199@ecust.edu.cn (M. Cai); xszhou@ecust.edu.cn (X. Zhou);

song\_zhiwei@bti.a-star.edu.sg (Z. Song)

### ***Construction of strains.***

Standard procedures for the manipulation of plasmid DNA were described before<sup>1</sup>. **(i) *Mig1 and Mig2 subcellular localization strains.*** The sequence between the *AsuII* and *NotI* sites of pGAPZ $\alpha$  A (Invitrogen) was replaced with a 743 bp *GFP* DNA (*AsuII-NotI*) amplified by PCR from pP-GFP (a vector capable of expressing a green fluorescent protein [GFP] under the control of *P<sub>AOX1</sub>*)<sup>2</sup> using primers GFP1 and GFP2, which included restriction sites for *AsuII* and *NotI*, respectively. Next, the resulting plasmid pGAP-GFP was further modified by replacing the sequence between the *NotI* and *SalI* sites with a 1,355 bp *MIG1* DNA (*NotI-SalI*) amplified by PCR from the genomic DNA of *P. pastoris*, thus generating a plasmid pGLM1. Finally, the plasmid pGLM1 was transformed by electroporation into wild-type *P. pastoris* strain GS115. Zeocin resistance transformants were isolated on YPD medium supplemented with 0.1 mg/ml zeocin. The method of construction of the GS115/pGLM2 strain was the same as that used for the GS115/pGLM1 strain. Both of the transformants were used to observe the subcellular localization of GFP-Mig1 and GFP-Mig2 under repressing (glucose or glycerol) or inducing (methanol) conditions, respectively. **(ii) *Amig1, Amig2 and Anrg1 strains.*** To knock out the *MIG1* gene with the zeocin resistance gene *Sh ble* as a marker, we first constructed plasmid pUC18-MIG1-del, a *MIG1* deletion vector. This deletion vector was constructed as follows: a 728 bp fragment containing sequences of the upstream region of *MIG1* was amplified by PCR using genomic DNA of *P. pastoris* as a template with *Pyrobest* DNA polymerase (TaKaRa, Japan) and the primers for this PCR, MI1U1 and MI1U2, carried restriction sites for *EcoRI* and *BamHI*, respectively. The upstream region fragment was inserted into *EcoRI/BamHI*-digested plasmid pUC18 (Invitrogen), yielding pMIG1Up. Next, a 1011 bp fragment consisting of the downstream region of *MIG1* was amplified by PCR with the primers MI1D1 and MI1D2 carrying restriction sites for *SalI* and *SphI*, respectively. The downstream region fragment was inserted into *SalI/SphI*-digested plasmid pUC18 (Invitrogen), yielding pMIG1Down. Moreover, to obtain the zeocin resistance gene sequence with its own promoter and terminator, a 1,321 bp fragment was amplified by PCR using the plasmid pPICZ A (Invitrogen) as a template with primers Zeo1 and Zeo2, which included restriction sites for *BamHI* and *SalI*, respectively. Then the fragment was cloned into *BamHI/SalI*-digested vector pMIG1Up to create vector pMIG1Up-*ble*. A 2.05-kb DNA fragment by digesting this plasmid with *EcoRI* and *SalI* was inserted into *EcoRI-SalI*-digested pMIG1Down, thus generating a deletion vector for *MIG1* (pUC18-MIG1-del). The deletion cassette was released from pUC18-MIG1-del as a 3.06-kb *EcoRI-SphI*-digested fragment and transformed by electroporation into WT *P. pastoris* strain GS115. Zeocin resistance transformants were

isolated on YPD (1% yeast extract, 2% peptone and 1% glucose) medium supplemented with 0.1 mg/ml zeocin. The correct integration of the deletion cassette into the genome and replacement of a 930 bp fragment near the upstream region of the full *MIG1* open reading frame (ORF) (1335bp) in the transformants were confirmed by PCR analysis and DNA sequencing. Knockout of the *MIG2* gene was the same as that used for the *MIG1* gene other than using the G418 resistance gene *KAN* as a marker, and the gene sequence with its own promoter and terminator (1,517 bp) was amplified by PCR using the plasmid pPIC3.5K (Invitrogen) as a template with primers Kan1 and Kan2. The full ORF of *MIG2* was totally replaced. Knockout of the *NRG1* gene was the same as that used for the *MIG1* gene other than using the hygromycin resistance gene *hph* as a marker, and the gene sequence with its own promoter and terminator (1,648 bp) was amplified by PCR using the plasmid pRDM054<sup>3</sup> (kindly provided by Prof. Suresh Subramani, University of California, San Diego) as a template with primers Hyg1 and Hyg2. The full ORF of *NRG1* was also totally replaced. **(iii) *Δmig1Δmig2* double-deletion strain.** The *Δmig1* and *Δmig2* strains were crossed and diploid hybrids<sup>4</sup> were selected on YPD medium supplemented with zeocin (0.2 mg/ml) and G418 (1 mg/ml). After sporulation, the *Δmig1Δmig2* double-deletion mutant was selected among spore progeny on the same medium, and confirmed for the presence of *MIG1* and *MIG2* deletion cassettes as detailed above for single-deletion mutants. Mating and sporulation techniques were performed using established procedures<sup>3</sup>. **(iv) *Δmig1Δmig2Δnrg1* treble-deletion strain.** We constructed the *Δmig1Δmig2Δnrg1* strain by the deletion of the *NRG1* gene in the *Δmig1Δmig2* double-deletion strain. The treble-deletion strain was isolated by the gene replacement method in the same way as that used for the *Δnrg1* single-deletion strain. **(v) *Strains overexpressing Mit1p and Prm1p.*** Constitutively expression Mit1p in yeast, the *MIT1* gene was cloned by PCR using GS115 genome as template with *EcoRI*-MIT1-5 and MIT1-3-*XhoI* primers. Then the resulting fragment was digested by *EcoRI* + *XhoI* and subsequently inserted into pGAPZA (Invitrogen) and resulted the plasmid pGGM1. Subsequently the pGAP-MIT1 fragment was realized from pGGM1 by *BglIII* + *XhoI*, and subsequently inserted into *BglIII* and *XhoI* of pPIC6A (Invitrogen), resulting plasmid pP6GM1. Then the pP6GM1 was linearized by *BlnI* and then transformed to WT, *Δmig1Δmig2* and *Δmig1Δmig2Δnrg1* by electroporation, respectively. The transformants were screened by 3 mg/ml blasticidin, resulting strains designated WT-Mit1, *Δmig1Δmig2*-Mit1 and *Δmig1Δmig2Δnrg1*-Mit1. The yeast strain constitutively expressing Prm1p was constructed as follows. The *PRM1* gene was amplified from GS115 genome with *SfiI*-PRM1-5 + PRM1-3-*XhoI* primers. After digested by *SfiI* and *XhoI*, the fragment was inserted into *SfiI* and *XhoI* of

pGAPZA, resulting pGGP1. The pGGP1 was linearized by *BlnI* and then transformed to WT strain by electroporation. The transformants were screened by 0.1 mg/ml zeocin, resulting strains designated WT-Prm1. (vi) **GFP and insulin precursor expression strains.** To easily describe the following procedure, we then named the strain of  $\Delta mig1\Delta mig2\Delta nrg1$ -Mit1 as MF1, based on which, the following strains were constructed. Firstly, pP-GFP plasmid<sup>2</sup> was linearized by *SalI* and subsequently transformed into *P. pastoris* MF1. The transformants were screened on YND plates without histidine and then on YNM plates. The Mut<sup>+</sup> strains were selected and named as *P. pastoris* MF1-GFP. Similarly, a strain which expressing GFP in  $\Delta mig1\Delta mig2$  was constructed and named as  $\Delta mig1\Delta mig2$ -Mit1-GFP. Then the insulin precursor (IP) plasmid pPIC9K/IP, which was constructed previously<sup>5</sup>, was linearized by *PmeI* and transformed into *P. pastoris* MF1. The Mut<sup>+</sup> transformants which could grow on the maximum concentration of 0.5, 1, 1.5, 2, 3, 4, 5 and 6 mg/mL G418 respectively were screened. Strains with the maximum production of IP in 500-mL baffled shake flask induced by glycerol were selected and designated as *P. pastoris* MF1-IP.

## References

1. Zhang, P. *et al.* Catabolite repression of Aox in *Pichia pastoris* is dependent on hexose transporter PpHxt1 and pexophagy. *Appl. Environ. Microbiol.* **76**, 6108-6118 (2010)
2. Xuan, Y. *et al.* An upstream activation sequence controls the expression of *AOX1* gene in *Pichia pastoris*. *FEMS Yeast Res.* **9**, 1271-1282 (2009)
3. Wang, Y. *et al.* Targeting expression of the catalytic domain of the kinase insert domain receptor (KDR) in the peroxisomes of *Pichia pastoris*. *FEMS Yeast Res.* **9**, 732-741 (2009)
4. Cregg, J. M. *Methods in Molecular Biology*. Vol. 389. *Pichia Protocols*. 2nd ed. (Totowa NJ:Humana Press 2007)
5. Xie, T., Liu, Q., Xie, F., Liu, H. & Zhang, Y. Secretory expression of insulin precursor in *Pichia pastoris* and simple procedure for producing recombinant human insulin. *Prep. Biochem. Biotechnol.* **38**, 308-317 (2008)

| Primer       | Sequence <sup>a</sup>                         |
|--------------|-----------------------------------------------|
| MI1U1        | 5-CCGGAATTCGCCGACCTTATTCTTGGAAG-3             |
| MI1U2        | 5-CGCGGATCCGATAAAAAAATTTTATGGT-3              |
| MI1D1        | 5-ACGCGTCGACCTACTCTCCGACAATGTTG-3             |
| MI1D2        | 5-ACATGCATGCTTCGGTCACTGATGGGTTGG-3            |
| Zeo1         | 5-CGCGGATCCCCACACACCATAGCT-3                  |
| Zeo2         | 5-ACGCGTCGACTAGTCCTGTCCGGTTT-3                |
| MI2U1        | 5-CCGGAATTCAGCATGTCAAATGTGAACGT-3             |
| MI2U2        | 5-CGCGGATCCTGCGAAGTATCTATTGGTGA-3             |
| MI2D1        | 5-ACGCGTCGACTTGTGACATATAAGTTTGT-3             |
| MI2D2        | 5-ACATGCATGCGCAGTTGCCCGTAATCAGAC-3            |
| Kan1         | 5-CGCGGATCCAAGGAGATGGCGCCCAAC-3               |
| Kan2         | 5-ACGCGTCGACACTTGAAGTCGGACAGT-3               |
| NRG15F       | 5-CGAGCTCCTGTGCCTATTACCCCCCTT-3               |
| NRG15R       | 5-TCCCCCGGGAACAGATAACCAAACGGACG-3             |
| NRG13F       | 5-GCTCTAGAGTATTTATTTACGGATTGGA-3              |
| NRG13R       | 5-ACATGCATGCTTCGGCTCCTCTTCCCA-3               |
| Hyg1         | 5-TCCCCCGGAGCTTGCCTTGTCCCCGCCG-3              |
| Hyg2         | 5-GCTCTAGATCGACACTGGATGGCGGCGT-3              |
| MIG1F        | 5-AAGGCGGCCGCTACCACTGCCTATCC-3                |
| MIG1R        | 5-ATGGTCGACTTATTTCTTTTCTTGATTTTC-3            |
| MIG2F        | 5-AAAGCGGCCGCTCTACTACTGCTCCCC-3               |
| MIG2R        | 5-GGGGTCGACTTAAGAGTCCGAGTTCATG-3              |
| GFP1         | 5'-TATTTCGAAACCATGGGATCTAAAGGTGAAGAATTATTC-3' |
| GFP2         | 5'-AGAGCGGCCGCCACCTTTGTACAATTCATC-3'          |
| EcoRI-MIT1-5 | 5-CCGGAATTCACCATGGGTAGTACCGCAGCCCCAAT-3       |
| MIT1-3-XhoI  | 5-CCGCTCGAGCTATTCTTCAACATTCCAGTA-3            |
| SfuI-PRM1-5  | 5-CAACTATTTCGAAACCATGGGTCTCCTAAACATCGGCTG-3   |
| PRM1-3-XhoI  | 5-CCGCTCGAGTAACTGTCAAAATTTATTGTATCT-3         |

**Table S1. Primers used in this study.** <sup>a</sup> Relevant restriction sites are underlined.

| Plasmid        | Characteristic(s)                                                                      | Source or reference |
|----------------|----------------------------------------------------------------------------------------|---------------------|
| pUC18          | Ampicillin <sup>R</sup> ; <i>E. coli</i> subcloning vector                             | Invitrogen          |
| pUC18-MIG1-del | pUC18 derivative carrying the PpMIG1 deletion cassette                                 | This study          |
| pUC18-MIG2-del | pUC18 derivative carrying the PpMIG2 deletion cassette                                 | This study          |
| pPIC3.5K       | Ampicillin <sup>R</sup> G418 <sup>R</sup> ; P <sub>AOXI</sub> -based expression vector | Invitrogen          |
| pPICZ A        | Zeocin <sup>R</sup> ; P <sub>AOXI</sub> -based expression vector                       | Invitrogen          |
| pRDM054        | Ampicillin <sup>R</sup> bleomycin <sup>R</sup> hygromycin <sup>R</sup>                 | 2                   |
| pGAPZα A       | Zeocin <sup>R</sup> ; P <sub>GAP</sub> -based expression vector                        | Invitrogen          |
| pGLM1          | pGAPZα A derivative carrying the GFP-MIG1 fusion gene                                  | This study          |
| pGLM2          | pGAPZα A derivative carrying the GFP-MIG2 fusion gene                                  | This study          |
| pGGM1          | pGAPZA derivative carrying P <sub>GAP</sub> -Mit1 expression cassette                  | This study          |
| pPIC6A         | Blasticidin <sup>R</sup> ; P <sub>AOXI</sub> -based expression vector                  | Invitrogen          |
| pP6GM1         | pPIC6A derivative carrying P <sub>GAP</sub> -Mit1 expression cassette                  | This study          |
| pGGP1          | pGAPZA derivative carrying P <sub>GAP</sub> -Prm1 expression cassette                  | This study          |
| pP-GFP         | pPIC3.5K derivative carrying P <sub>AOXI</sub> -GFP expression cassette                | This study          |
| pPIC9K/IP      | pPIC9K derivative carrying P <sub>AOXI</sub> -(insulin precursor) expression cassette  | This study          |

**Table S2. Plasmids used in this study.** <sup>R</sup>, resistance to indicated antimicrobial agent.

| Primer   | Sequence                    |
|----------|-----------------------------|
| RT-ACT1F | 5-CTCCAATGAACCCAAAGTCCAAC-3 |
| RT-ACT1R | 5-GACAAAACGGCCTGAATAGAAAC-3 |
| RT-MIT1F | 5-GACTAATGACGATGAACTAAG-3   |
| RT-MIT1R | 5-TGCTGTTGTTGGTAGAAT-3      |
| RT-PRM1F | 5-CGAACTTGATGATGAGAACA-3    |
| RT-PRM1R | 5-CATTGGCTATTCCTGAACTG-3    |
| RT-MXR1F | 5-ATGCTGCTGATGCTATGA-3      |
| RT-MXR1R | 5-GCGGTCTGAATCGTTATTAC-3    |

**Table S3. Sequence of gene-specific PCR primers used in the study.**





### Original gels/blots for Figure 1C

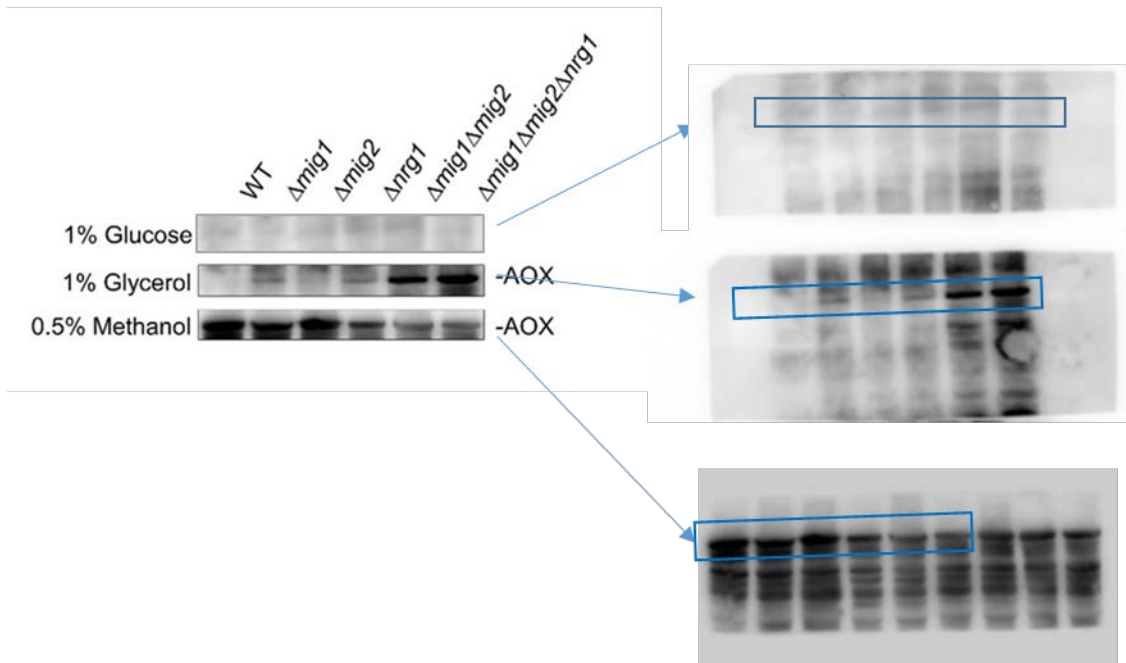

### Original gels/blots for Figure 2C

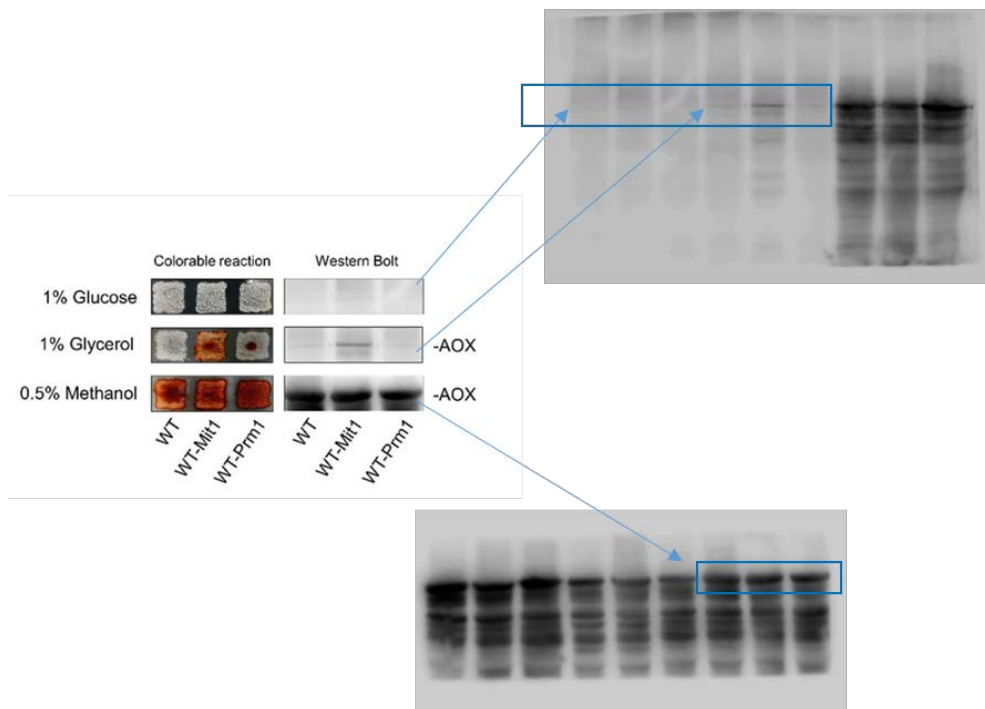

**Figure S2. Original gels and blots for figure results (Figure 1C and Figure 2B) shown in the manuscript.**

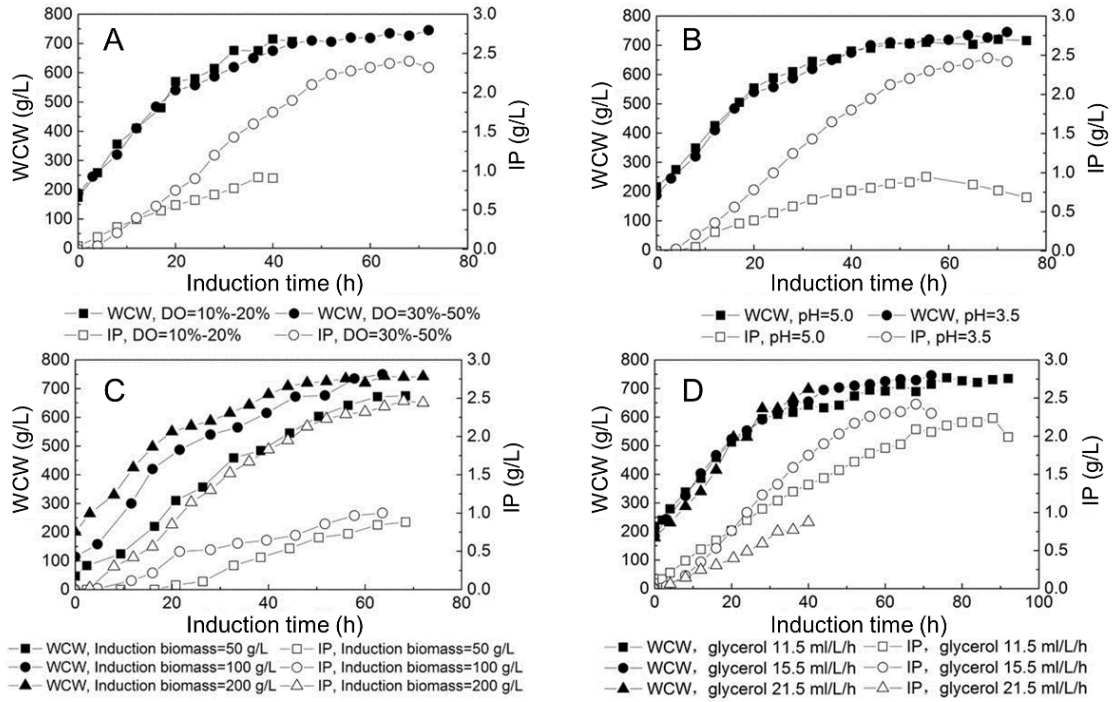

**Figure S3. Effects of DO, pH, induction biomass and induction feeding rate of glycerol on cell growth and insulin precursor expression of the MF1-IP strain. (A) DO; (B) pH; (C) Induction biomass; (D) Glycerol feeding rate.**
